# Supplementary figures and images for: Spatiotemporal dynamics of DNA nanocage uptake in zebrafish embryos for targeted tissue bioimaging applications
Source: Royal Society of Chemistry journal article supplement (doi:10.1039/d2na00905f), 2023-01-01

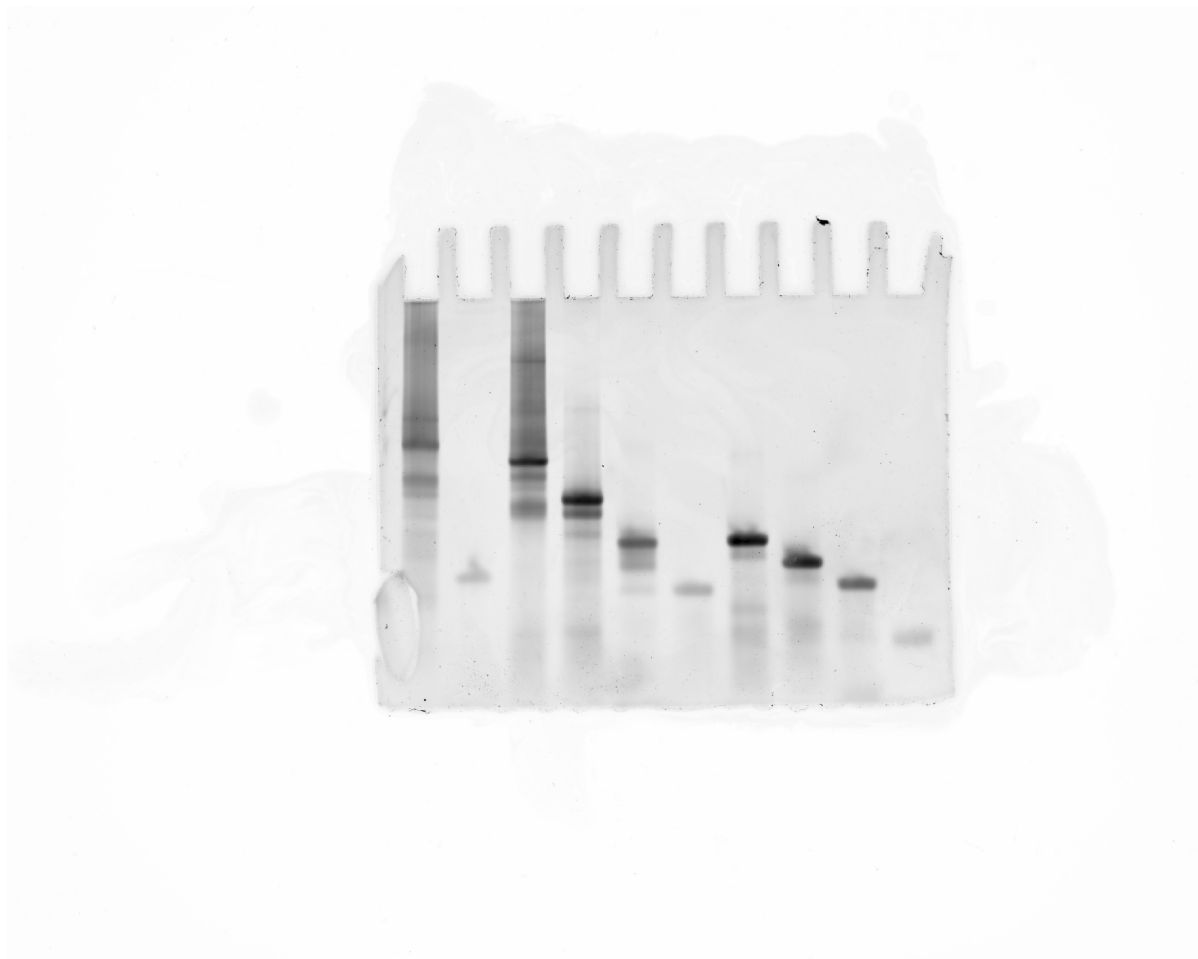

Supplement: d2na00905f1.pdf [file d2na00905f1.pdf]
